# Supplementary material for: Identification of a competing endogenous RNA axis related to gastric cancer
Source: publisher site journal article supplement (doi:10.18632/aging.103926), 2020-10-20
Supplement: Supplementary file [file aging-v12i20-103926-supplementary-material-SD2.pdf]

## SUPPLEMENTARY TABLE

**Supplementary Table 1. The commonly upregulated or downregulated genes in GSE54129, GSE29272 and GSE13911 datasets and TCGA databases.**

| Upregulated genes | Downregulated genes |
|-------------------|---------------------|
| APOE              | ACER2               |
| ASPN              | ADH1C               |
| BGN               | ADH7                |
| CDH11             | ADHFE1              |
| CDH3              | ADRB2               |
| CEMIP             | AKR1B10             |
| CHI3L1            | AKR1B15             |
| CLDN1             | AKR1C1              |
| CLEC5A            | AKR7A3              |
| COL10A1           | ALDH3A1             |
| COL11A1           | ALDH6A1             |
| COL12A1           | ALDOB               |
| COL1A1            | AMPD1               |
| COL1A2            | ANXA10              |
| COL3A1            | ATP4A               |
| COL4A1            | ATP4B               |
| COL5A2            | B3GNT6              |
| COL8A1            | BHLHA15             |
| COMP              | CA2                 |
| CPXM1             | CAPN9               |
| CST1              | CCKAR               |
| CST2              | CCKBR               |
| CTHRC1            | CHGA                |
| CXCL1             | CKB                 |
| CXCL10            | CKM                 |
| CXCL8             | CKMT2               |
| CXCL9             | CLIC6               |
| DTL               | CPB1                |
| ECT2              | CTSE                |
| F2RL2             | CYP2C18             |
| FAP               | CYP2C19             |
| FKBP10            | CYP2C9              |
| FNDC1             | DPT                 |
| HOXA10            | DUOX1               |
| HOXA13            | EPN3                |
| HOXC10            | ESRRG               |
| HOXC6             | ETNPPL              |
| IFITM1            | FAM46C              |
| IGF2BP3           | FBP2                |
| INHBA             | FCGBP               |
| ITGBL1            | FMO5                |
| KLK6              | GATA5               |
| LAIR2             | GCNT4               |
| LIF               | GHRL                |
| LIPG              | GIF                 |
| LOX               | GKN1                |
| LY6E              | GKN2                |
| MAGEA6            | GPER1               |
| MFAP2             | GRIA4               |
| MMP11             | GSTA1               |
| MMP12             | GSTA3               |
| MMP3              | GUCA2B              |
| MMP7              | HDC                 |
| MSR1              | HOMER2              |
| NOX4              | IGJ                 |
| OLFM4             | IRX3                |
| OLFML2B           | KCNE2               |
| OLR1              | KCNJ13              |
| P4HA3             | KCNJ15              |
| PDGFRB            | KCNJ16              |

PLA2G2A  
PLA2G7  
PLAU  
PMEPA1  
PRRX1  
RARRES1  
SALL4  
SERPINE1  
SERPINH1  
SFRP4  
SNX10  
SPARC  
SPP1  
SULF1  
THBS2  
THY1  
TIMP1  
TNFAIP6  
TNFRSF11B  
TNFSF4  
TREM1  
TREM2  
VCAN  
WNT2

KLF4  
KRT20  
LDHD  
LTF  
MAMDC2  
MAOA  
MT1E  
MT1G  
MT1H  
MT1M  
MT1X  
MUC6  
MYRIP  
NKX6-2  
NR0B2  
PDIA2  
PGA4  
PGC  
PIGR  
RAB27A  
RDH12  
REG3A  
SCGB2A1  
SCNN1B  
SCNN1G  
SH3GL2  
SIDT2  
SLC26A7  
SLC5A5  
SMPD3  
SOX21  
SPTSSB  
SST  
SSTR1  
SULT2A1  
SYTL5  
TCN1  
TFF1  
TFF2  
TMED6  
TNFRSF17  
UGT2B15  
UPK1B  
VSIG1  
VSIG2  
VSTM2A

---
