# Supplementary material for: Identification of a competing endogenous RNA axis related to gastric cancer
Source: Aging (Albany NY). 2020 Oct 20;12(20):20540–60. doi: 10.18632/aging.103926 (PMC7655175; doi:10.18632/aging.103926)
Supplement: Supplementary Table 4 [file aging-12-103926-s005..xlsx]

## Sheet: Sheet1
	Table S4. The raw data of Figure 5.
	Figure 5A: Relative expression of DLGAP1-AS1 in MKN-45														P value of Figure 5A
			GAPDH				DLGAP1-AS1 expression				DLGAP1-AS1 value				Group		Summary	P value
			Well-1	Well-2	Well-3		Well-1	Well-2	Well-3		Δ CT	ΔΔ CT	2 -ΔΔCT		si-NC vs si-DLGAP1-AS1-1		***	<0.0001
	Repeat-1	si-NC#1	17.4703	17.6166	17.4096		24.2731	24.4467	24.2078		6.81035	-0.114554	1.08264		si-NC vs si-DLGAP1-AS1-2		***	<0.0001
		si-DLGAP1-AS1-1#1	17.4224	17.4562	17.5016		26.5557	26.211	26.701		9.02914	2.10424	0.232573
		si-DLGAP1-AS1-2#1	17.4667	17.4656	17.2723		25.3652	25.7093	25.2408		8.03691	1.11201	0.462649
	Repeat-2	si-NC#2	17.5831	17.5019	17.5015		24.6193	24.4426	24.5299		7.00174	0.0768439	0.94813
		si-DLGAP1-AS1-1#2	17.3116	17.6184	17.3602		26.3301	26.1299	26.059		8.74296	1.81806	0.283603
		si-DLGAP1-AS1-2#2	17.3449	17.3456	17.404		25.4048	25.6022	25.6739		8.19547	1.27057	0.414497
	Repeat-3	si-NC#3	17.4186	17.5181	17.4699		24.3273	24.6022	24.3648		6.96261	0.0377097	0.9742
		si-DLGAP1-AS1-1#3	17.5276	17.4709	17.5018		26.7068	25.9214	26.1862		8.7714	1.8465	0.278066
		si-DLGAP1-AS1-2#3	17.3894	17.3966	17.4585		25.6233	25.5757	25.7986		8.25103	1.32613	0.398836
	Figure 5B: Relative expression of miR-203a-3p in MKN-45														P value of Figure 5B
			GAPDH				miR-203a-3p expression				miR-203a-3p value				Group		Summary	P value
			Well-1	Well-2	Well-3		Well-1	Well-2	Well-3		Δ CT	ΔΔ CT	2 -ΔΔCT		si-NC vs si-DLGAP1-AS1-1		***	<0.0001
	Repeat-1	si-NC#1	17.3145	17.4759	17.3773		24.2335	24.1978	24.3167		6.86007	-0.18237	1.13475		si-NC vs si-DLGAP1-AS1-2		***	<0.0001
		si-DLGAP1-AS1-1#1	17.4978	17.3354	17.4186		22.8375	22.7478	23.1149		5.48282	-1.55963	2.94777
		si-DLGAP1-AS1-2#1	17.3792	17.4327	17.4607		23.4421	23.0203	23.0528		5.74752	-1.29492	2.45363
	Repeat-2	si-NC#2	17.1753	17.3861	17.1206		24.3426	24.5299	24.297		7.16251	0.12007	0.920143
		si-DLGAP1-AS1-1#2	17.4424	17.6515	17.6118		23.012	22.6172	23.3279		5.41713	-1.62531	3.08509
		si-DLGAP1-AS1-2#2	17.1702	17.3525	17.4095		22.9859	22.6413	23.4266		5.70718	-1.33526	2.5232
	Repeat-3	si-NC#3	17.4326	17.4676	17.6817		24.5273	24.6022	24.7666		7.10474	0.0623003	0.957736
		si-DLGAP1-AS1-1#3	17.2274	17.3043	17.2741		22.5859	22.4624	22.8374		5.35998	-1.68247	3.20976
		si-DLGAP1-AS1-2#3	17.5878	17.6586	17.5258		23.8071	22.6698	23.1922		5.63231	-1.41013	2.65762
	Figure 5C: Relative expression of THBS2 in MKN-45														P value of Figure 5B
			GAPDH				THBS2 expression				THBS2 value				Group		Summary	P value
			Well-1	Well-2	Well-3		Well-1	Well-2	Well-3		Δ CT	ΔΔ CT	2 -ΔΔCT		si-NC vs si-DLGAP1-AS1-1		***	<0.0001
	Repeat-1	si-NC#1	17.4855	17.5732	17.3882		23.7074	24.0698	23.9853		6.43857	0.0604	0.958998		si-NC vs si-DLGAP1-AS1-2		***	<0.0001
		si-DLGAP1-AS1-1#1	17.5025	17.6053	17.5296		24.8286	25.1268	24.9786		7.43226	1.05409	0.4816
		si-DLGAP1-AS1-2#1	17.5248	17.5204	17.5588		24.5081	25.0743	24.7958		7.25807	0.8799	0.543405
	Repeat-2	si-NC#2	17.5769	17.6235	17.5064		23.888	23.8214	24.1775		6.39336	0.0151917	0.989525
		si-DLGAP1-AS1-1#2	17.5091	17.4257	17.4085		24.7048	25.083	25.2907		7.57842	1.20025	0.4352
		si-DLGAP1-AS1-2#2	17.6513	17.5129	17.5728		24.4799	24.8121	24.8528		7.13597	0.757803	0.591396
	Repeat-3	si-NC#3	17.3658	17.3846	17.4155		23.7812	23.5471	23.7453		6.30258	-0.0755917	1.05379
		si-DLGAP1-AS1-1#3	17.6334	17.5931	17.5608		25.1916	24.9153	25.2421		7.52059	1.14242	0.453
		si-DLGAP1-AS1-2#3	17.4525	17.581	17.4204		24.327	24.7924	24.535		7.06681	0.688643	0.620437
	Figure 5D: Relative expression of DLGAP1-AS1 in AGS														P value of Figure 5B
			GAPDH				DLGAP1-AS1 expression				DLGAP1-AS1 value				Group		Summary	P value
			Well-1	Well-2	Well-3		Well-1	Well-2	Well-3		Δ CT	ΔΔ CT	2 -ΔΔCT		si-NC vs si-DLGAP1-AS1-1		***	<0.0001
	Repeat-1	si-NC#1	16.4756	16.7234	16.4122		23.0665	22.8272	22.7016		6.32804	-0.0423643	1.0298		si-NC vs si-DLGAP1-AS1-2		***	<0.0001
		si-DLGAP1-AS1-1#1	16.3207	16.6289	16.3178		24.8416	25.1631	25.0875		8.60827	2.23786	0.212
		si-DLGAP1-AS1-2#1	16.628	16.333	16.232		24.3519	24.7193	24.6629		8.18036	1.80995	0.2852
	Repeat-2	si-NC#2	16.4826	16.5634	16.7752		23.0954	22.8361	23.1998		6.43669	0.0662883	0.955092
		si-DLGAP1-AS1-1#2	16.5371	16.4504	16.5299		25.0312	24.8211	25.1353		8.49009	2.11969	0.230097
		si-DLGAP1-AS1-2#2	16.5048	16.3961	16.4122		24.4807	24.4463	24.6083		8.07409	1.70369	0.307
	Repeat-3	si-NC#3	16.5726	16.4291	16.3995		23.0912	22.6605	22.6889		6.34648	-0.023924	1.01672
		si-DLGAP1-AS1-1#3	16.3448	16.6302	16.3524		24.7143	24.6534	24.9024		8.31426	1.94386	0.25992
		si-DLGAP1-AS1-2#3	16.4519	16.313	16.3081		23.9392	24.0038	24.7726		7.88086	1.51046	0.351
	Figure 5E: Relative expression of miR-203a-3p in AGS														P value of Figure 5B
			GAPDH				miR-203a-3p expression				miR-203a-3p value				Group		Summary	P value
			Well-1	Well-2	Well-3		Well-1	Well-2	Well-3		Δ CT	ΔΔ CT	2 -ΔΔCT		si-NC vs si-DLGAP1-AS1-1		***	<0.0001
	Repeat-1	si-NC#1	16.1092	16.3103	16.1527		22.4869	22.4084	22.9535		6.42553	0.0751295	0.949257		si-NC vs si-DLGAP1-AS1-2		***	<0.0001
		si-DLGAP1-AS1-1#1	16.3991	16.2055	16.3124		20.7707	21.4602	21.41		4.90798	-1.44243	2.71778
		si-DLGAP1-AS1-2#1	16.4748	16.1511	16.4317		21.538	21.2586	21.5175		5.08549	-1.26491	2.40313
	Repeat-2	si-NC#2	16.123	16.356	16.2431		22.5445	22.5483	22.6513		6.34064	-0.00976693	1.00679
		si-DLGAP1-AS1-1#2	16.1755	16.2841	16.3074		21.3019	20.8727	21.3213		4.90965	-1.44075	2.71463
		si-DLGAP1-AS1-2#2	16.4614	16.4323	16.4449		21.2721	21.344	21.6952		4.99091	-1.35949	2.56595
	Repeat-3	si-NC#3	16.1469	16.1237	16.1815		22.6539	22.2385	22.4149		6.28504	-0.0653626	1.04635
		si-DLGAP1-AS1-1#3	16.3388	16.4072	16.321		21.0565	21.2445	21.2243		4.81945	-1.53095	2.88976
		si-DLGAP1-AS1-2#3	16.3824	16.564	16.3212		21.5347	21.3618	21.3753		5.0014	-1.34901	2.54737
	Figure 5F: Relative expression of THBS2 in AGS														P value of Figure 5B
			GAPDH				THBS2 expression				THBS2value				Group		Summary	P value
			Well-1	Well-2	Well-3		Well-1	Well-2	Well-3		Δ CT	ΔΔ CT	2 -ΔΔCT		si-NC vs si-DLGAP1-AS1-1		***	<0.0001
	Repeat-1	si-NC#1	16.1217	16.0499	16.0243		22.7254	22.2946	22.223		6.34901	0.0408126	0.972107		si-NC vs si-DLGAP1-AS1-2		***	<0.0001
		si-DLGAP1-AS1-1#1	16.232	16.2156	16.1834		24.0696	24.248	24.0345		7.907	1.59881	0.33015
		si-DLGAP1-AS1-2#1	16.1778	16.628	16.233		24.3533	24.2616	24.3897		7.98858	1.68038	0.312
	Repeat-2	si-NC#2	16.2275	16.0628	16.2057		22.3263	22.3613	22.7377		6.30976	0.00156871	0.998913
		si-DLGAP1-AS1-1#2	16.2618	16.2128	16.4564		24.1781	24.4947	24.5107		8.08415	1.77596	0.292
		si-DLGAP1-AS1-2#2	16.3243	16.2591	16.1553		24.1217	24.1532	23.8465		7.7942	1.486	0.357
	Repeat-3	si-NC#3	16.146	16.1217	16.2884		22.4351	22.3449	22.5733		6.26581	-0.0423813	1.02981
		si-DLGAP1-AS1-1#3	16.4384	16.1814	16.4313		24.3221	24.1244	24.7356		8.04372	1.73552	0.3003
		si-DLGAP1-AS1-2#3	16.1228	16.4269	16.0691		23.9355	23.9191	23.8652		7.70033	1.39214	0.381
		Figure 5G: OD value (450 nm) of MKN-45													P value of Figure 5G
		Time (H)	si-NC				si-DLGAP1-AS1-1				si-DLGAP1-AS1-2				Group		Summary	P value
			Repeat-1	Repeat-2	Repeat-3		Repeat-1	Repeat-2	Repeat-3		Repeat-1	Repeat-2	Repeat-3		si-NC vs si-DLGAP1-AS1-1		***	0.0007
		0	0.259928	0.231047	0.252708		0.252708	0.216606	0.238267		0.252708	0.259928	0.231047		si-NC vs si-DLGAP1-AS1-2		**	0.0014
		24	0.527076	0.490975	0.476534		0.397112	0.425993	0.353791		0.447653	0.425993	0.418773
		48	0.851986	0.902527	0.960289		0.6587	0.590397	0.635379		0.768123	0.695921	0.724801
		72	1.36072	1.24022	1.30686		0.707581	0.772563	0.794224		0.844765	0.909747	0.815884
		96	1.67953	1.52791	1.56845		0.895307	0.967509	1.01083		1.19191	1.13415	1.08108
		Figure 5H: OD value (450 nm) of AGS													P value of Figure 5H
		Time (H)	si-NC				si-DLGAP1-AS1-1				si-DLGAP1-AS1-2				Group		Summary	P value
			Repeat-1	Repeat-2	Repeat-3		Repeat-1	Repeat-2	Repeat-3		Repeat-1	Repeat-2	Repeat-3		si-NC vs si-DLGAP1-AS1-1		***	0.0002
		0	0.195558	0.231509	0.224335		0.209947	0.231529	0.195558		0.217141	0.202752	0.231509		si-NC vs si-DLGAP1-AS1-2		***	0.0008
		24	0.39829	0.434241	0.419873		0.333522	0.362319	0.311959		0.369513	0.34791	0.39829
		48	0.81683	0.701722	0.752102		0.442749	0.485935	0.5291		0.545011	0.595411	0.516274
		72	1.21226	1.35651	1.2714		0.71025	0.652696	0.774978		0.845337	0.766201	0.802192
		96	1.5573	1.65275	1.58205		0.812222	0.877011	0.74032		0.932982	0.897011	0.983321
